# Supplementary material for: Vernalization-triggered expression of the antisense transcript COOLAIR is mediated by CBF genes
Source: eLife journal article supplement (doi:10.7554/elife.84594), 2023-02-01

Dotted outlines indicate the cropping.

| (kb) | WT |    | <i>FLC<sub>ΔCOOLAIR</sub></i> |    |             |    |             |    | Cold Duration<br>(days) |  |
|------|----|----|-------------------------------|----|-------------|----|-------------|----|-------------------------|--|
|      | 0  | 14 | $\Delta$ -1                   |    | $\Delta$ -3 |    | $\Delta$ -4 |    |                         |  |
|      |    |    | 0                             | 14 | 0           | 14 | 0           | 14 |                         |  |
| 0.25 |    |    |                               |    |             |    |             |    | I.i                     |  |
| 0.10 |    |    |                               |    |             |    |             |    | (36 cycles)             |  |
| 0.25 |    |    |                               |    |             |    |             |    | II.i                    |  |
| 0.10 |    |    |                               |    |             |    |             |    | (36 cycles)             |  |
| 0.25 |    |    |                               |    |             |    |             |    | II.ii                   |  |
| 0.10 |    |    |                               |    |             |    |             |    | (36 cycles)             |  |
| 0.25 |    |    |                               |    |             |    |             |    | CAS                     |  |
| 0.10 |    |    |                               |    |             |    |             |    | (36 cycles)             |  |
| 0.25 |    |    |                               |    |             |    |             |    | Unspliced<br><i>FLC</i> |  |
| 0.10 |    |    |                               |    |             |    |             |    | (30 cycles)             |  |
| 0.10 |    |    |                               |    |             |    |             |    | <i>UBC</i>              |  |
|      |    |    |                               |    |             |    |             |    | (26 cycles)             |  |

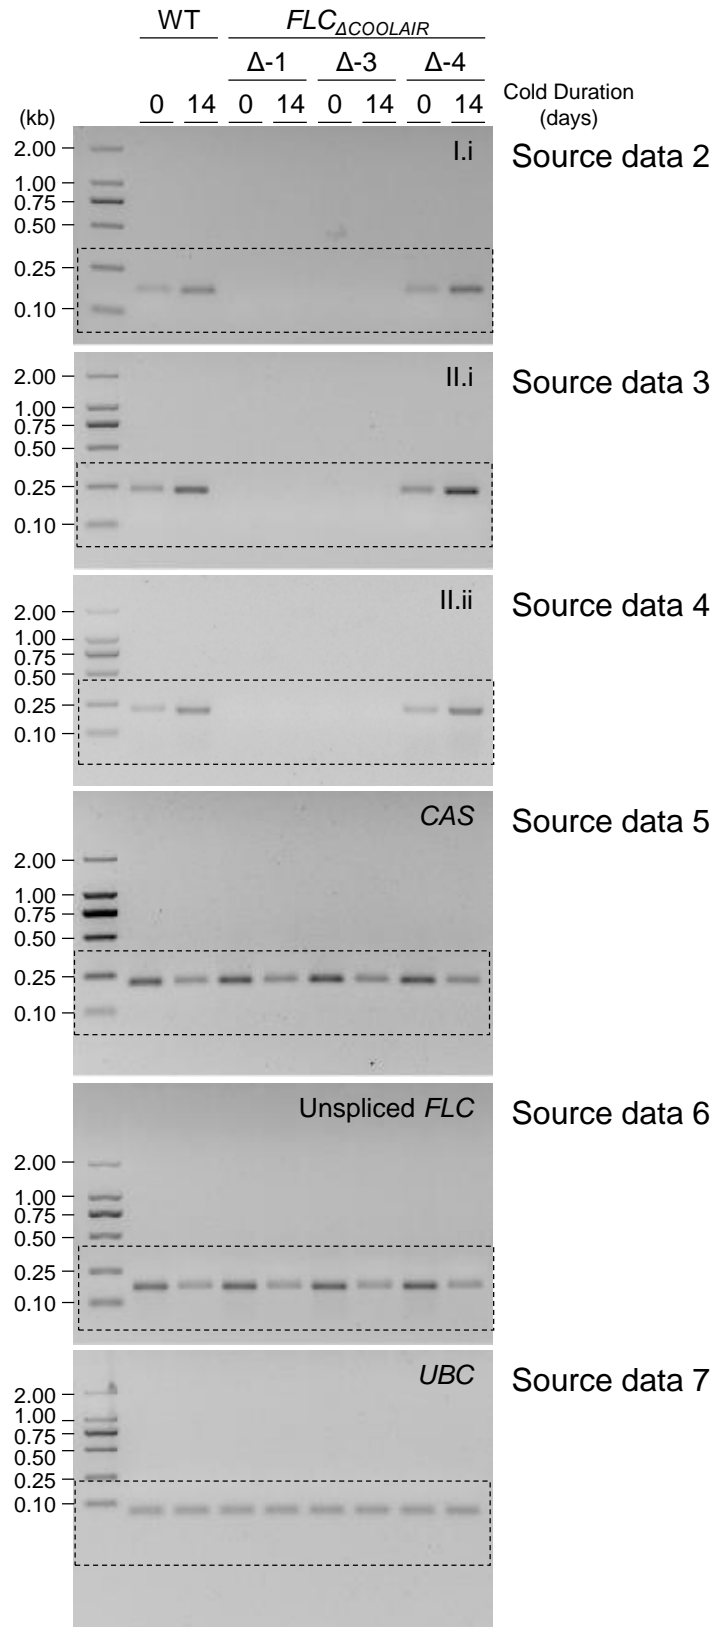

Supplement: supp [file elife-84594-supp-v1.zip]
