# Supplementary material for: Vernalization-triggered expression of the antisense transcript COOLAIR is mediated by CBF genes
Source: eLife journal article supplement (doi:10.7554/elife.84594), 2023-02-01

**Figure 1—source data 1.**  
**Uncropped labeled gel image and the original image file for the EMSA result.**  
Dotted outline indicates the cropping.

Figure panel (Figure 1B)

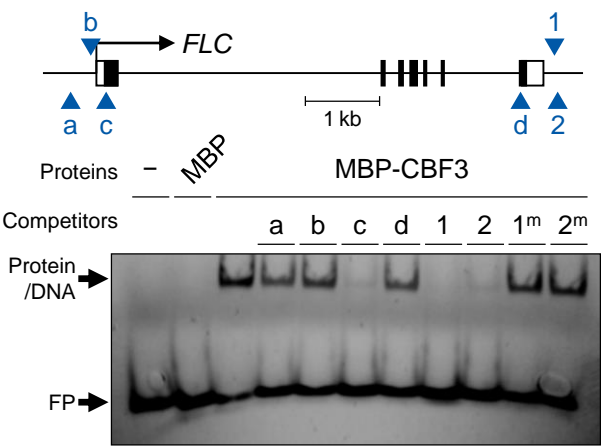

Source data 2

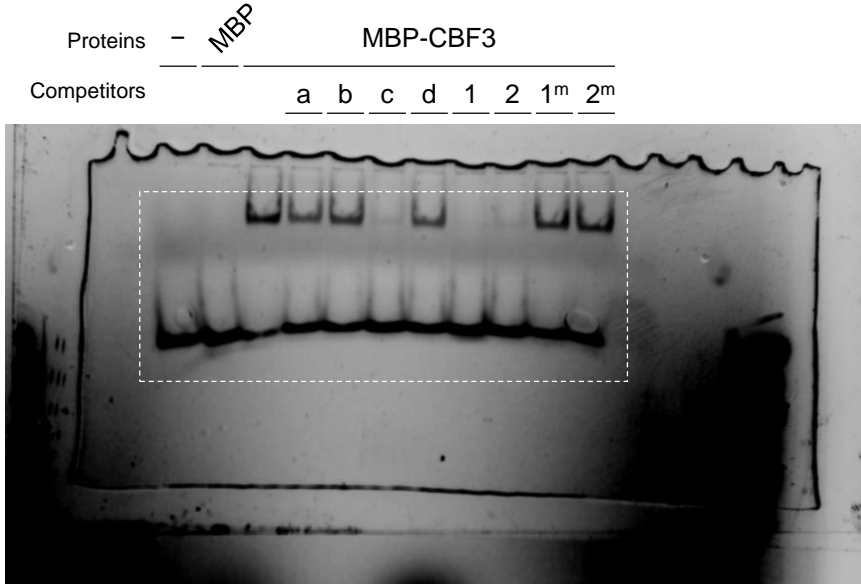

Supplement: supp [file elife-84594-supp-v1.zip]
