# Supplementary material for: Vernalization-triggered expression of the antisense transcript COOLAIR is mediated by CBF genes
Source: eLife journal article supplement (doi:10.7554/elife.84594), 2023-02-01
Supplement: supp [file elife-84594-supp-v1.zip]

**A***FLC*<sub>ΔCOOLAIR-3</sub>

+5901 GCTTCACAGT AGAATTACAA +6605

685-bp deletion

+5911 GAAGAAGCCTACGGCTTATTTTGCACAGGGACGT  
 GGCTCTCTCTCTCTCTCTGCGCGTTTTTCTCTCG  
 TCGTAATTAATTTGTTTTTATCCTAACGCGTATG  
 GTTGGCATGGGTTTTTGGGCCTATGTCGGTCACA  
 TTCGGCCCAATAAGCTTAGTTCTTAAAGTCATTGC  
 TGTTAACGTGACCGACCTCTTCCATATTTTCTTTG  
 GACTAAATTCACCTCCGTAGTTCGGTCATCCATGA  
 AGGATCCCTTAAACTAATCCACATTTATATAATGA  
 TAACACTTCTTTTTTCCCACTAAAATGATAATAC  
 TTTTAGACATTATATGTATAAATATAATTCACATA  
 TAGAATAGAAAAAGTTACGCTCGTATTTATATTAA  
 TTTAGATCAACAGTTCCAGACGCCATTGTCATTAA  
 TCACCTTTTAACATTTCTGATTTAAATTAAATCAT  
 AGTCTATATACTCTGATTCAGCCTACAAGATGATA  
 AATAGAGAATCGTCAGTGTTAAAATGCACTCTTAC  
 GTAACGAGGAAACATAAGCACGTTCTGGTCGGACC  
 GAAGCTAACCAGCAATTTTCATCACTCTATTTTACA  
 TTCTAGTTAATCCACAAAATTTTGATATACAAAAT  
 TATAATATTATTCATTGTATAATTTAAAAGTGAAA  
 GGTTTGTTAAATATAGTAGT +6595

**B***FLC*<sub>ΔCOOLAIR-4</sub>

+6213 AAAATGATAA ATTTTGATAT +6533

301-bp deletion

+6223 TACTTTTAGACATTATATGTATAAATATAATTCAC  
 ATATAGAATAGAAAAAGTTACGCTCGTATTTATAT  
 TAATTTAGATCAACAGTTCCAGACGCCATTGTCAT  
 TAATCACCTTTTAACATTTCTGATTTAAATTAAAT  
 CATAGTCTATATACTCTGATTCAGCCTACAAGATG  
 ATAAATAGAGAATCGTCAGTGTTAAAATGCACTCT  
 TACGTAACGAGGAAACATAAGCACGTTCTGGTCGG  
 ACCGAAGCTAACCAGCAATTTTCATCACTCTATTTT  
 ACATTCTAGTTAATCCACAAA +6523

13-bp replacement

+6014 TGGTTGG +6020

+1' GTTCTTTGTCGGT +13'
