# Supplementary material for: Vernalization-triggered expression of the antisense transcript COOLAIR is mediated by CBF genes
Source: eLife journal article supplement (doi:10.7554/elife.84594), 2023-02-01

**Figure 1—figure supplement 2—source data 1.**  
**Uncropped labeled gel images and the original image files for the EMSA results.**  
Dotted outlines indicate the cropping.

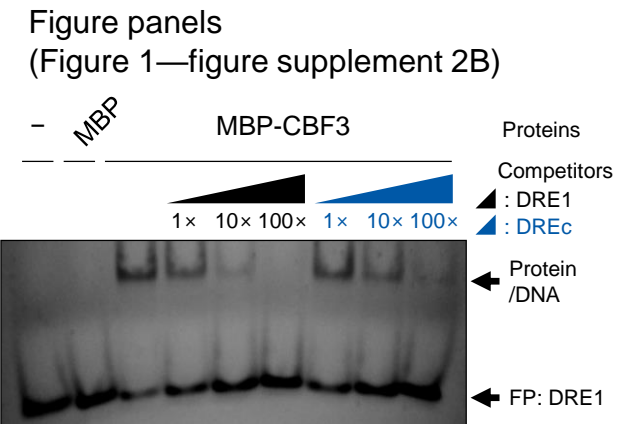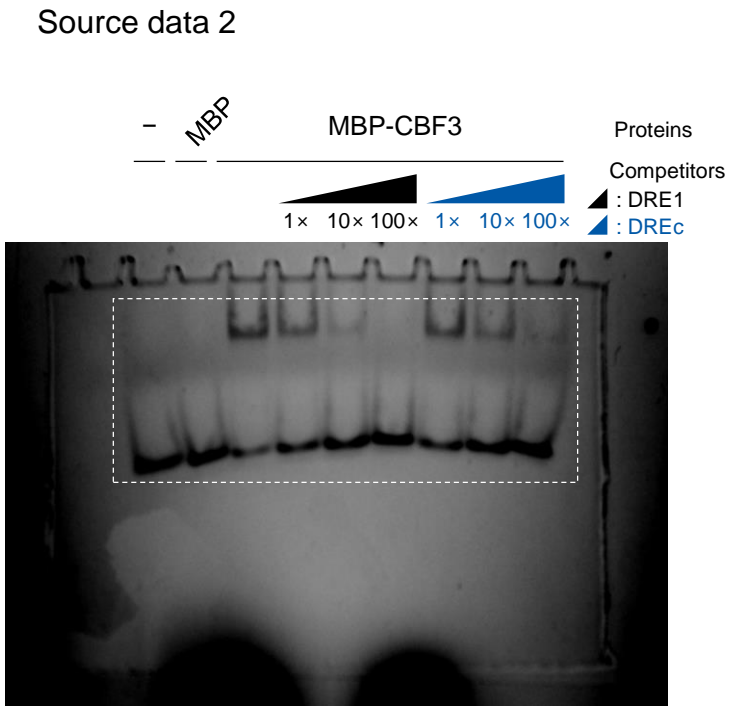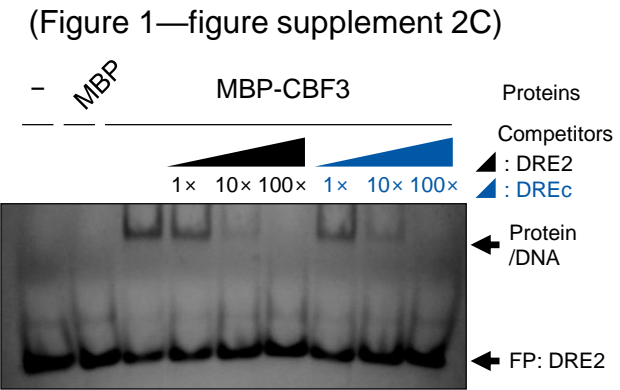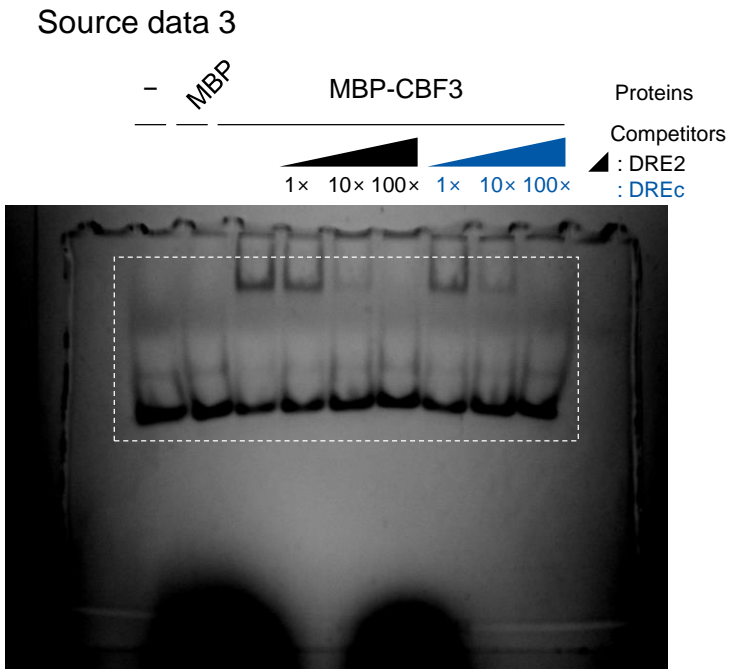

Supplement: supp [file elife-84594-supp-v1.zip]
