# Supplementary material for: Vernalization-triggered expression of the antisense transcript COOLAIR is mediated by CBF genes
Source: eLife journal article supplement (doi:10.7554/elife.84594), 2023-02-01

**Figure 3—source data 1.**  
**Uncropped labeled blot images and the original image files for the immunoblots.**  
Dotted outlines indicate the cropping.

Figure panel (Figure 3D)

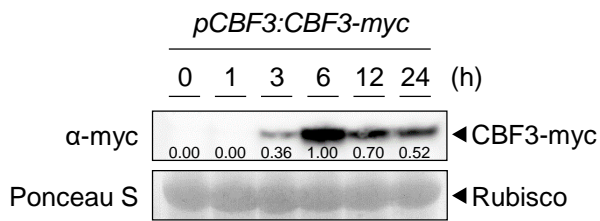

Source data 2  
Anti-myc immunoblot (chemiluminescence)

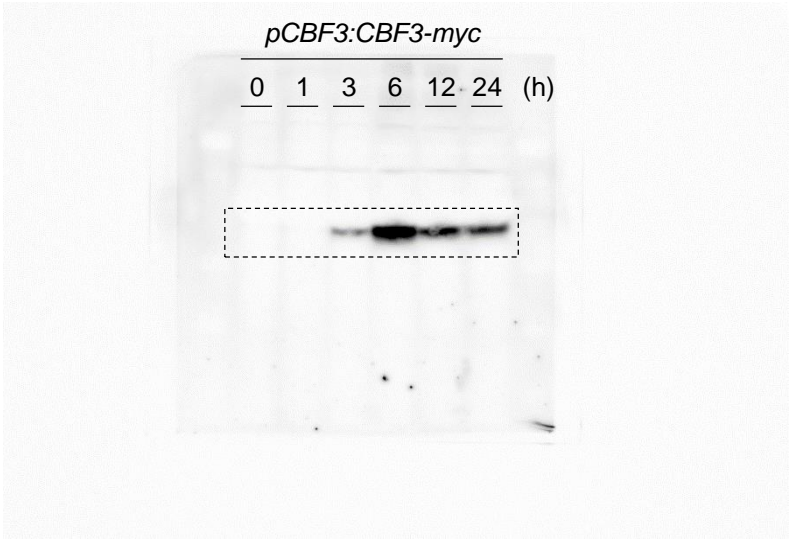

Source data 3  
Ponceau S staining

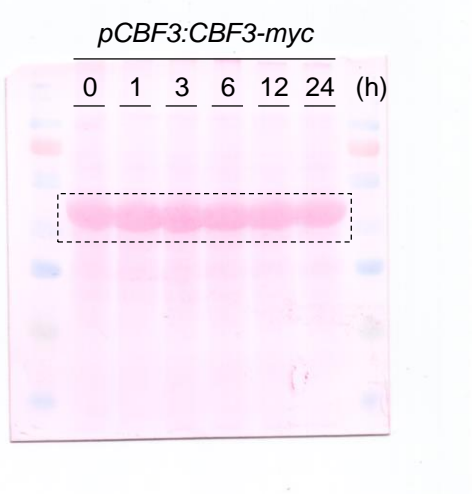

Figure panel (Figure 3E)

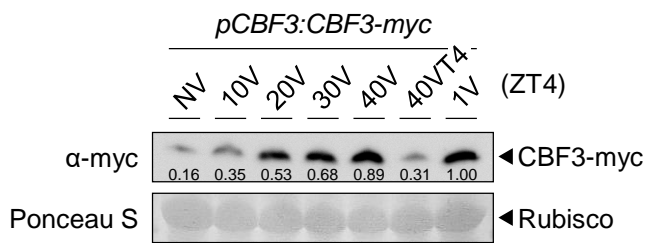

Source data 2  
Anti-myc immunoblot (chemiluminescence)

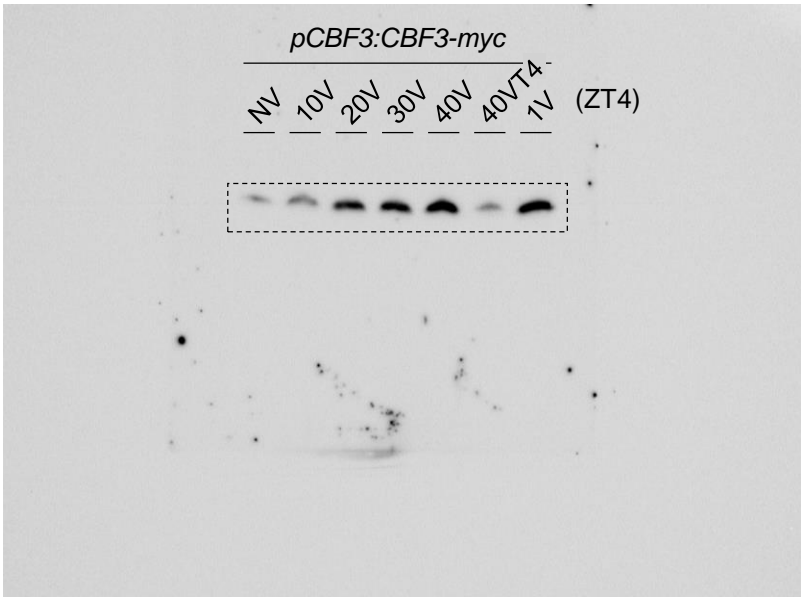

Source data 3  
Ponceau S staining

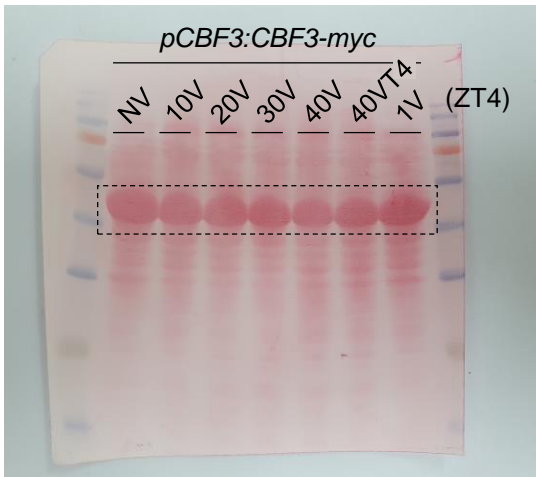

Supplement: supp [file elife-84594-supp-v1.zip]
