# Supplementary material for: Vernalization-triggered expression of the antisense transcript COOLAIR is mediated by CBF genes
Source: eLife. 2023 Feb 1;12:e84594. doi: 10.7554/eLife.84594 (PMC10036118; doi:10.7554/eLife.84594)
Supplement: Supplementary file 1. [file elife-84594-supp1.xlsx]

## Sheet: 1A
Supplementary File 1. Oligonucleotide sequences used in this study.
Supplementary File 1A. Probes and competitors used for EMSA.
P, Cy5-labeled probe; C, unlabeled competitor.
DRE1	P	Cy5-CCGAATGTGACCGACATAGGCCCAA
	C	CCGAATGTGACCGACATAGGCCCAA
DRE2	P	Cy5-TATGGAAGAGGTCGGTCACGTTAAC
	C	TATGGAAGAGGTCGGTCACGTTAAC
DRE1m	C	CCGAATGTGTGAACCCAAGGCCCAA
DRE2m	C	TATGGAAGCGAGGTGTCACGTTAAC
DREa	C	TTGAACTCTTCCGACTTCTCAAAAC
DREb	C	AATATCTGGCCCGACGAAGAAAAAG
DREc	C	ACAAAAGTAGCCGACAAGTCACCTT
DREd	C	GGACAAATCTCCGACAATCTTCCGG

## Sheet: 1B
Supplementary File 1. Oligonucleotide sequences used in this study.
Supplementary File 1B. Primers used for ChIP assay.
FLC −2,320–2,267	F	ATCCAGAAAAGGGCAAGGAG
	R	CGAATCGATTGGGTGAATG
FLC −1,599–1,530	F	TGGAGGGAACAACCTAATGC
	R	TCATTGGACCAAACCAAACC
FLC −392–272	F	ACTATGTAGGCACGACTTTGGTAAC
	R	TGCAGAAAGAACCTCCACTCTAC
FLC −49–+53	F	GCCCGACGAAGAAAAAGTAG
	R	TCCTCAGGTTTGGGTTCAAG
FLC +157–314*†	F	CGACAAGTCACCTTCTCCAAA
	R	AGGGGGAACAAATGAAAACC
FLC +416–502†	F	GGCGGATCTCTTGTTGTTTC
	R	CTTCTTCACGACATTGTTCTTCC
FLC +652–809	F	CGTGCTCGATGTTGTTGAGT
	R	TCCCGTAAGTGCATTGCATA
FLC +1,144–1,257	F	CCTTTTGCTGTACATAAACTGGTC
	R	CCAAACTTCTTGATCCTTTTTACC
FLC +1,533–1,670	F	TTGACAATCCACAACCTCAATC
	R	TCAATTTCCTAGAGGCACCAA
FLC +1,933–2,171	F	AGCCTTTTAGAACGTGGAACC
	R	TCTTCCATAGAAGGAAGCGACT
FLC +2,465–2,560*	F	AGTTTGGCTTCCTCATACTTATGG
	R	CAATGAACCTTGAGGACAAGG
FLC +3,197–3,333	F	GGGGCTGCGTTTACATTTTA
	R	GTGATAGCGCTGGCTTTGAT
FLC +3,998–4,178	F	CTTTTTCATGGGCAGGATCA
	R	TGACATTTGATCCCACAAGC
FLC +4,322–4,469	F	AGAACAACCGTGCTGCTTTT
	R	TGTGTGCAAGCTCGTTAAGC
FLC +5,139–5,244	F	CCGGTTGTTGGACATAACTAGG
	R	CCAAACCCAGACTTAACCAGAC
FLC +5,643–5,758	F	TGGTTGTTATTTGGTGGTGTG
	R	ATCTCCATCTCAGCTTCTGCTC
FLC +6,057–6,175*	F	CGTGTGAGAATTGCATCGAG
	R	AAAAACGCGCAGAGAGAGAG
FLC +6,877–6,947	F	TTGTAAAGTCCGATGGAGACG
	R	ACTCGGCGAGAAAGTTTGTG
pTUB2	F	ACAAACACAGAGAGGAGTGAGCA
	R	ACGCATCTTCGGTTGGATGAGTGA
ACT7	F	TCGTTTCGCTTTCCTTAGTGT
	R	CGAAATCGGCATAGAGAATCA
FUS3	F	GTGGCAAGTGTTGATCATGG
	R	AGTTGGCACGTGGGAAATAG
* These primers were also used for ChIP analysis shown in Figure 1C. FLC +157–314, +2,465–2,560, +6,057–6,175 correspond to P1, P2, and P3, respectively.
† These primers, amplifying the nucleation region of FLC, were used for the statistical test of Figures 6A to 6C.

## Sheet: 1C
Supplementary File 1. Oligonucleotide sequences used in this study.
Supplementary File 1C. Primer sequences for gene expression analysis.
Total COOLAIR	F	TGTATGTGTTCTTCACTTCTGTCAA
	R	GCCGTAGGCTTCTTCACTGT
	F	TCGTGTGAGAATTGCATCGAG
	R	AGCCACGTCCCTGTTGCAAA
COOLAIR class I.i	F	GACAAATCTCCGACAATCTTCC
	R	CTCACACGAATAAGGTGGCTAAT
	F	TCATCATGTGGGAGCAGAAG
	R	TCTCACACGAATAAGGTGGCTA
	F	TCACACGAATAAGGTGGCTAATTAAG	For Figure 5B
	R	TCCTTGGATAGAAGACAAAAAGAGA
COOLAIR class IIi	F	CTCCTCCGGCGATAAGTA
	R	CTCACACGAATAAGAAAAGTAAAA
	F	TGCAATTCTCACACGAATAAGAAAAGT	For Figure 5B
	R	TAGCCGACAAGTCACCTTCTCCAA
COOLAIR class IIii	F	CTCCTCCGGCGATAAGTA
	R	ACGATAATCATAGAAAAGTAAAAGAGC
	F	TAGTGGGAGAGTCACCGGAAG	For Figure 5B
	R	TTCTCCTCCGGCGATAAGTAC
FLC mRNA	F	AGCCAAGAAGACCGAACTCA
	R	TTTGTCCAGCAGGTGACATC
Unspliced FLC	F	CGCAATTTTCATAGCCCTTG
	R	CTTTGTAATCAAAGGTGGAGAGC
CAS	F	ATCTCATGTATCTATCATGGTCGCAGA
	R	TTCTCCTCCGGCGATAAGTAC
CBF1	F	GGAGACAATGTTTGGGATGC
	R	CGACTATCGAATATTAGTAACTCC
CBF2	F	CGACGGATGCTCATGGTCTT
	R	TCTTCATCCATATAAAACGCATCTTG
CBF3	F	TTCCGTCCGTACAGTGGAAT
	R	AACTCCATAACGATACGTCGTC
COR15A	F	CTTACCTAATCAGTTAATTTCAAGCA
	R	TTAAACATGAAGAGAGAGGATATGG
RD29A	F	ATGGATCAAACAGAGGAACCACCA
	R	CTTAGTCGCACCATTCTCATGATG
PP2A	F	TATCGGATGACGATTCTTCGTGCAG
	R	GCTTGGTCGACTATCGGAATGAGAG
UBC	F	TTGTGCCATTGAATTGAACCC
	R	CATCCTAATGTTCATTTCAAGACAG

## Sheet: 1D
Supplementary File 1. Oligonucleotide sequences used in this study.
Supplementary File 1C. Primer sequences for plasmid construction.
Underlining indicates a restriction enzyme recognition site.
35S:CBF3-HA		F	CGGGATCCATGAACTCATTTTCTGCTTTTTC
		R	CGCAGGCCTATAACTCCATAACGATACGTC
pCOOLAIR:LUC		F	CGCCTGCAGAGTAACTAGAATGTGAAATAGAG
		R	CGCCCATGGGGAGAATAATCATCATGTGG
	DREm		CGCACGCGTGCGCGGTGTGGGGGGGTCGGGGGGCCTGGGTTCACACATTCGGCCC
pFLC:LUC		F	CGCCTGCAGATAAAATTAGATAAAGAAGAAATTGG
		R	CGCCCATGGCATCGCCGGAGGAGAA
