# Supplementary figures and images for: Vernalization-triggered expression of the antisense transcript COOLAIR is mediated by CBF genes
Source: eLife journal article supplement (doi:10.7554/elife.84594), 2023-02-01

**A**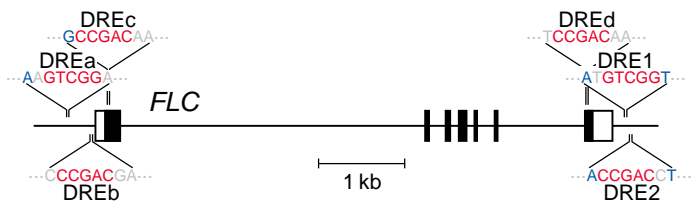**B**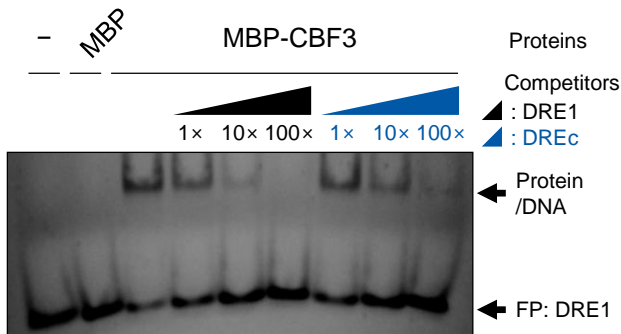**C**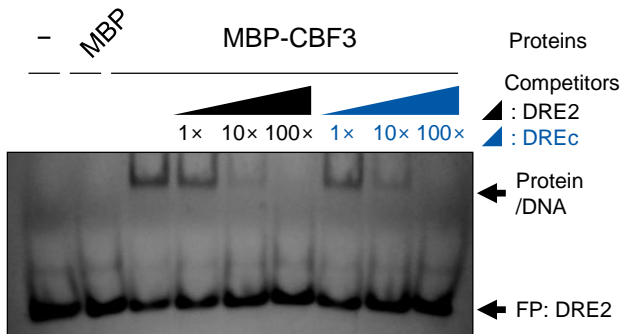

Supplement: supp [file elife-84594-supp-v1.zip]

**A**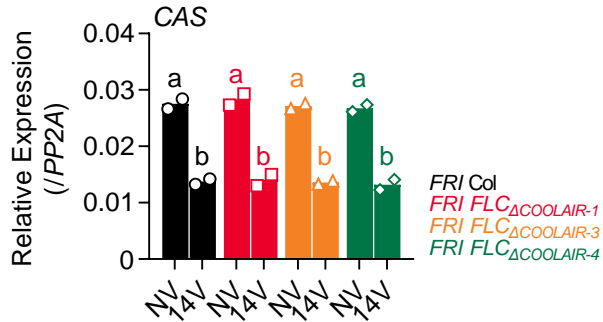**B**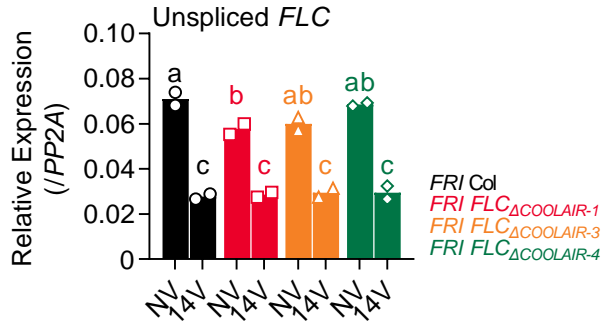

Supplement: supp [file elife-84594-supp-v1.zip]

*COOLAIR* (AT5G01675)

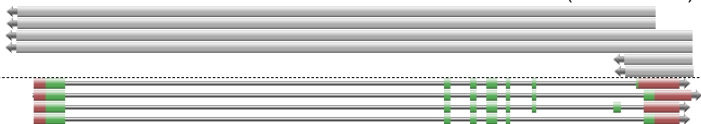

*FLC* (AT5G10140)

CBF1

CBF1-amp

CBF2

CBF2-amp

CBF3

CBF3-amp

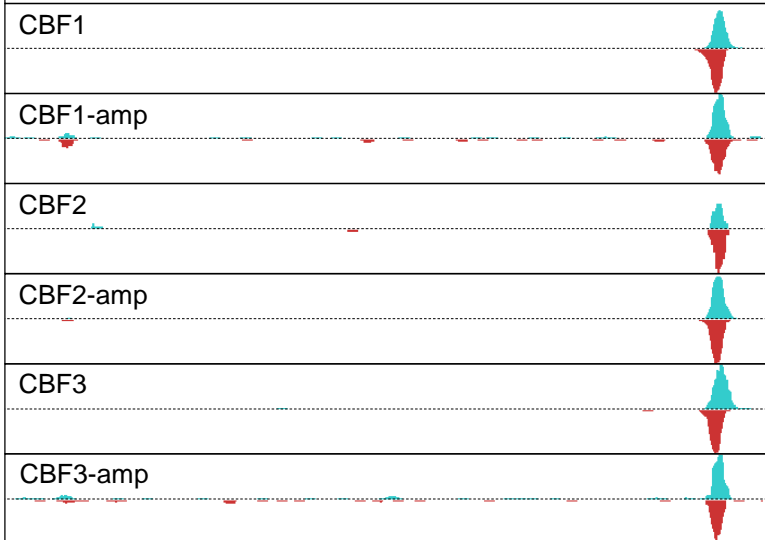

Supplement: supp [file elife-84594-supp-v1.zip]

**A**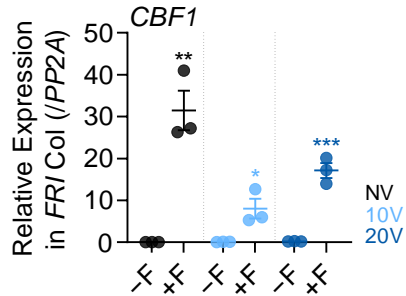**B**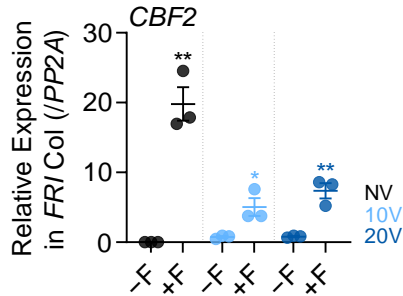**C**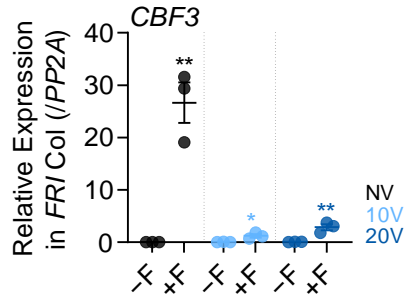

Supplement: supp [file elife-84594-supp-v1.zip]

**A**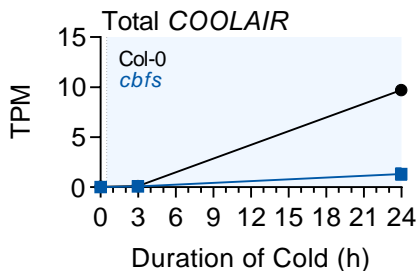**B**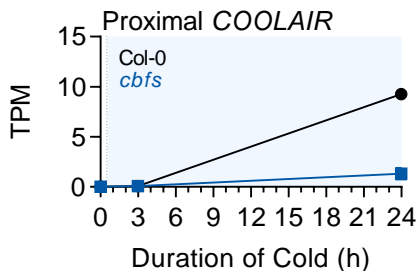**C**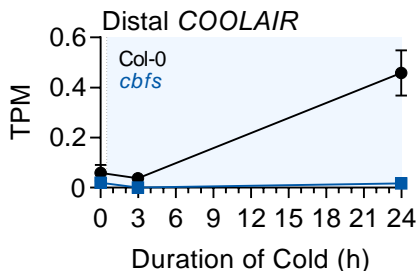**D**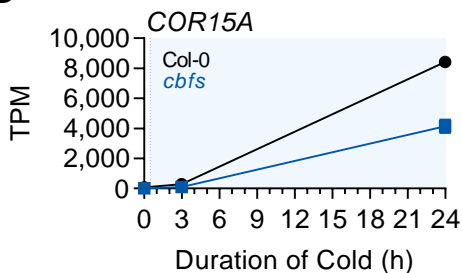**E**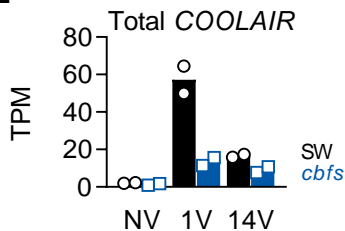**F**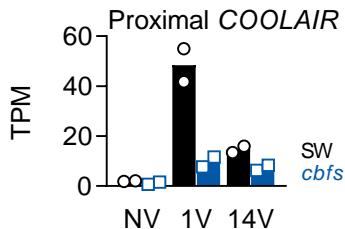**G**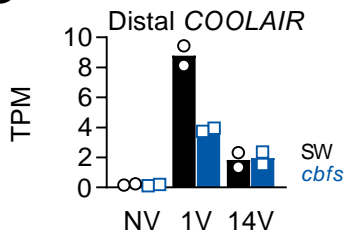**H**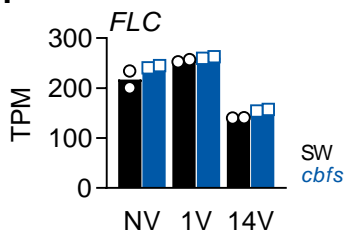

Supplement: supp [file elife-84594-supp-v1.zip]

**A**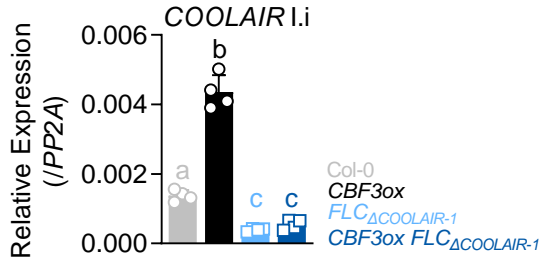**B**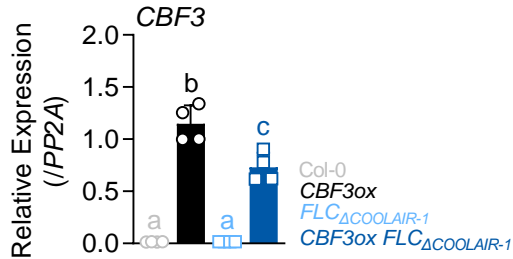

Supplement: supp [file elife-84594-supp-v1.zip]

NV

20V

0 4 8 12 16 20 24 0 4 8 12 16 20 24 (ZT)

$\alpha$ -myc

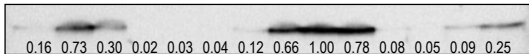

◀ CBF3-myc

Ponceau S

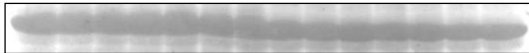

◀ Rubisco

Supplement: supp [file elife-84594-supp-v1.zip]

**A**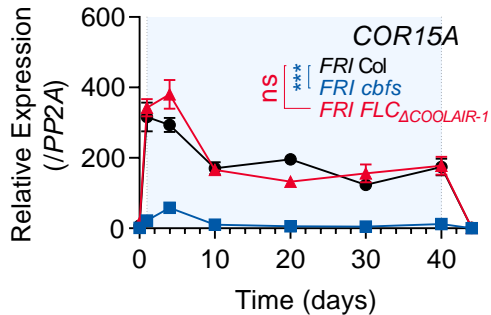**B**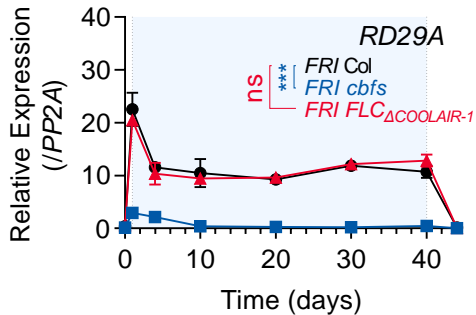

Supplement: supp [file elife-84594-supp-v1.zip]

**A**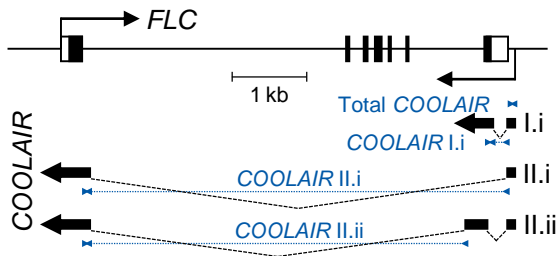**B**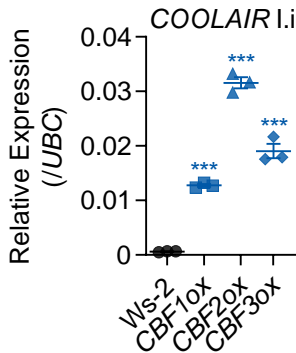**C**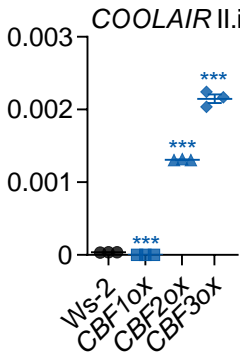**D**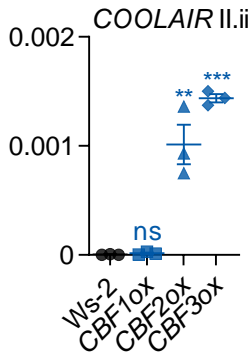

Supplement: supp [file elife-84594-supp-v1.zip]
